# Supplementary material for: First Synthesis of Ergotamine-13CD3 and Ergotaminine-13CD3 from Unlabeled Ergotamine
Source: MDPI journal article supplement (doi:10.3390/toxins16040199), 2024-04-20
Supplement: s1 [file s1]

# Supplementary Materials: First Synthesis of Ergotamine-<sup>13</sup>CD<sub>3</sub> and Ergotaminine-<sup>13</sup>CD<sub>3</sub> from Unlabeled Ergotamine

Sven-Oliver Herter, Hajo Haase and Matthias Koch

Table S1: Formula, theoretical mass (*m/z*), observed mass and deviation Δ*m/m* [ppm] for the main fragment ions of ergotamine-<sup>13</sup>CD<sub>3</sub>.

| Formula                                                                                                  | Theoretical mass<br>[M+H] <sup>+</sup> | Measured mass<br>[M+H] <sup>+</sup> | Δ <i>m/m</i> [ppm] |
|----------------------------------------------------------------------------------------------------------|----------------------------------------|-------------------------------------|--------------------|
| <sup>13</sup> CC <sub>32</sub> H <sub>33</sub> D <sub>3</sub> N <sub>5</sub> O <sub>5</sub> <sup>+</sup> | 586.2933                               | 586.2933                            | 0 - recalibrated   |
| <sup>13</sup> CC <sub>32</sub> H <sub>31</sub> D <sub>3</sub> N <sub>5</sub> O <sub>4</sub> <sup>+</sup> | 568.2827                               | 568.2817                            | -1.8               |
| <sup>13</sup> CC <sub>31</sub> H <sub>31</sub> D <sub>3</sub> N <sub>5</sub> O <sub>5</sub> <sup>+</sup> | 540.2878                               | 540.2863                            | -2.6               |
| <sup>13</sup> CC <sub>18</sub> H <sub>15</sub> D <sub>3</sub> N <sub>3</sub> O <sub>2</sub> <sup>+</sup> | 324.1615                               | 324.1608                            | -2.3               |
| C <sub>17</sub> H <sub>20</sub> N <sub>3</sub> O <sub>3</sub> <sup>+</sup>                               | 314.1499                               | 314.1490                            | -2.9               |
| C <sub>17</sub> H <sub>17</sub> N <sub>2</sub> O <sub>3</sub> <sup>+</sup>                               | 297.1234                               | 297.1231                            | -1.0               |
| <sup>13</sup> CC <sub>17</sub> H <sub>15</sub> D <sub>3</sub> N <sub>3</sub> O <sup>+</sup>              | 290.1666                               | 290.1660                            | -2.0               |
| C <sub>17</sub> H <sub>13</sub> N <sub>2</sub> O <sub>2</sub> <sup>+</sup>                               | 277.0972                               | 277.0970                            | -0.6               |
| <sup>13</sup> CC <sub>15</sub> H <sub>15</sub> D <sub>3</sub> N <sub>3</sub> O <sup>+</sup>              | 272.1666                               | 272.1664                            | -0.8               |
| <sup>13</sup> CC <sub>15</sub> H <sub>12</sub> D <sub>3</sub> N <sub>2</sub> O <sup>+</sup>              | 255.1401                               | 255.1394                            | -2.6               |
| <sup>13</sup> CC <sub>14</sub> H <sub>12</sub> D <sub>3</sub> N <sub>2</sub> <sup>+</sup>                | 227.1452                               | 227.1449                            | -1.1               |
| C <sub>14</sub> H <sub>10</sub> NO <sup>+</sup>                                                          | 208.0757                               | 208.0752                            | -3.3               |

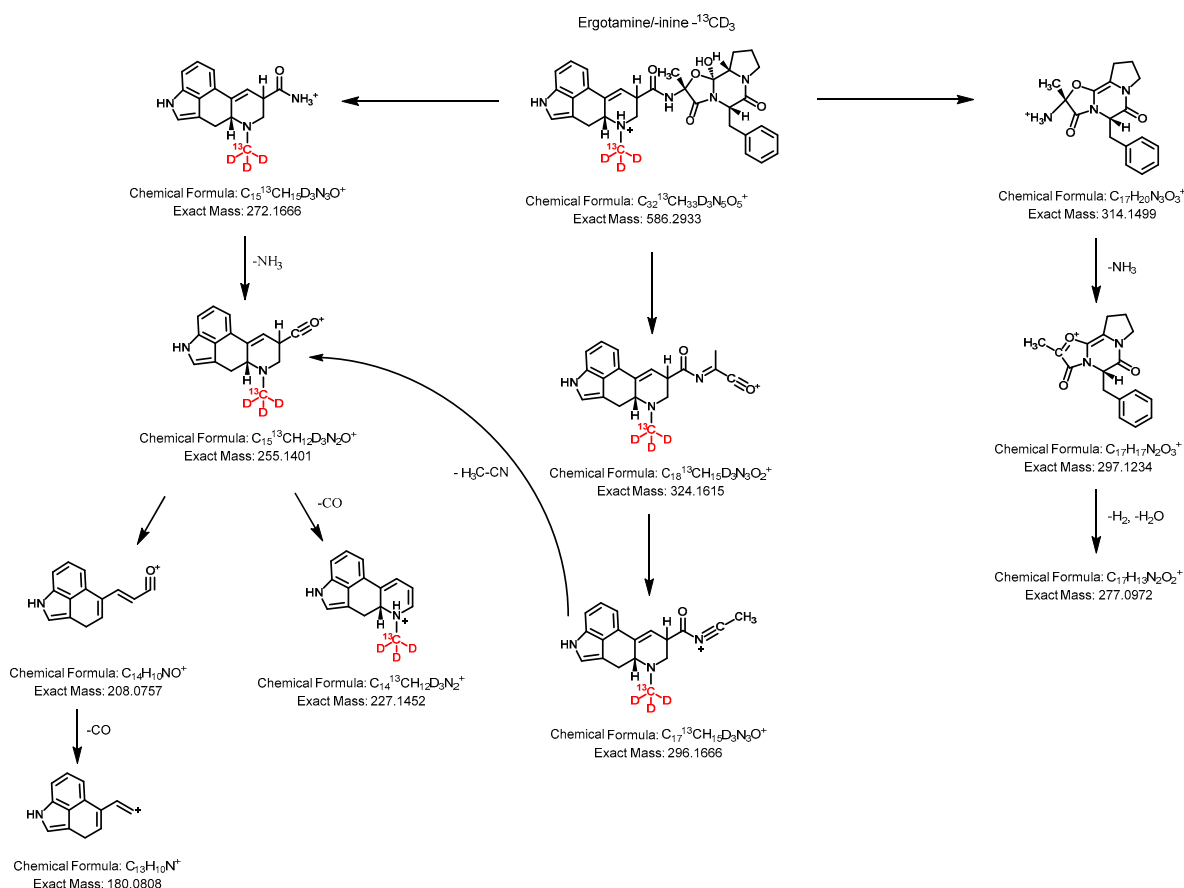

Figure S1. Potential structures of ergotamine/-inine-<sup>13</sup>CD<sub>3</sub> product ions produced by MS/MS. A structural proposal for the compound with the theoretical mass *m/z* 277.0972 could not be made due to complex fragmentation. Therefore, only the calculated chemical formula is provided.

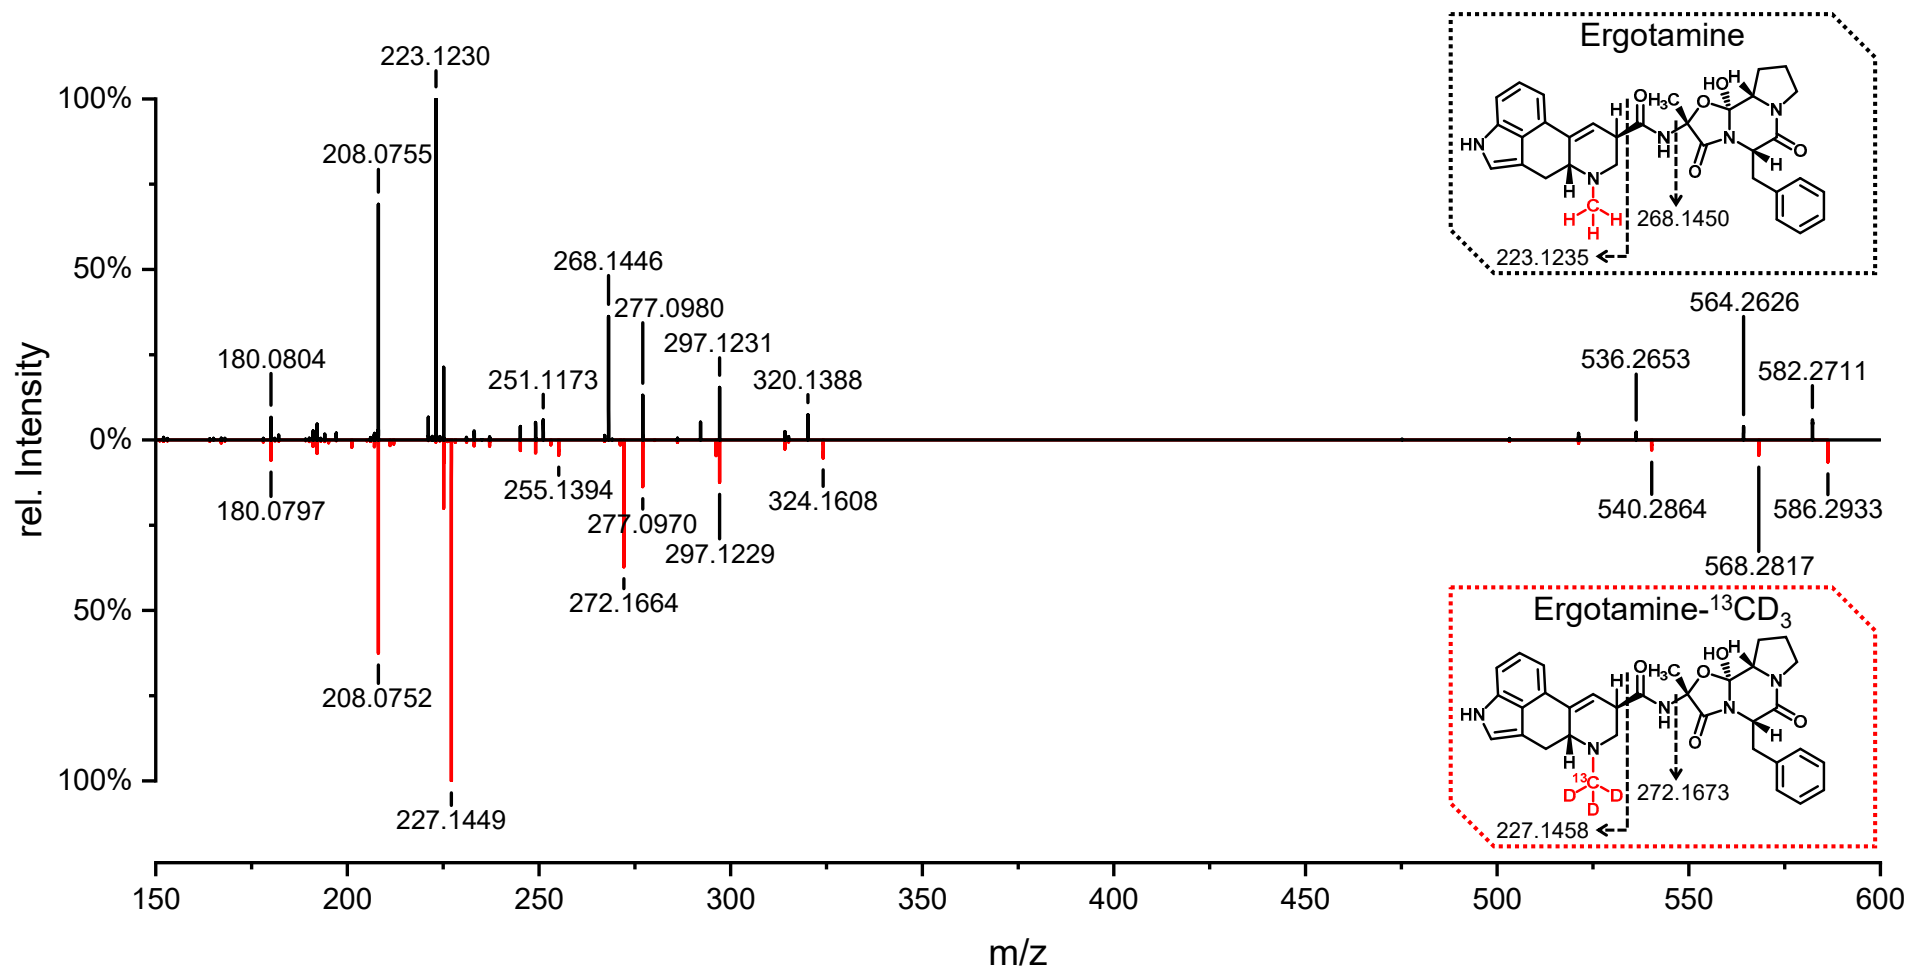

Figure S2. High resolution tandem mass spectra of unlabeled ergotamine (black) and isotopically labelled ergotamine-<sup>13</sup>CD<sub>3</sub> (red).

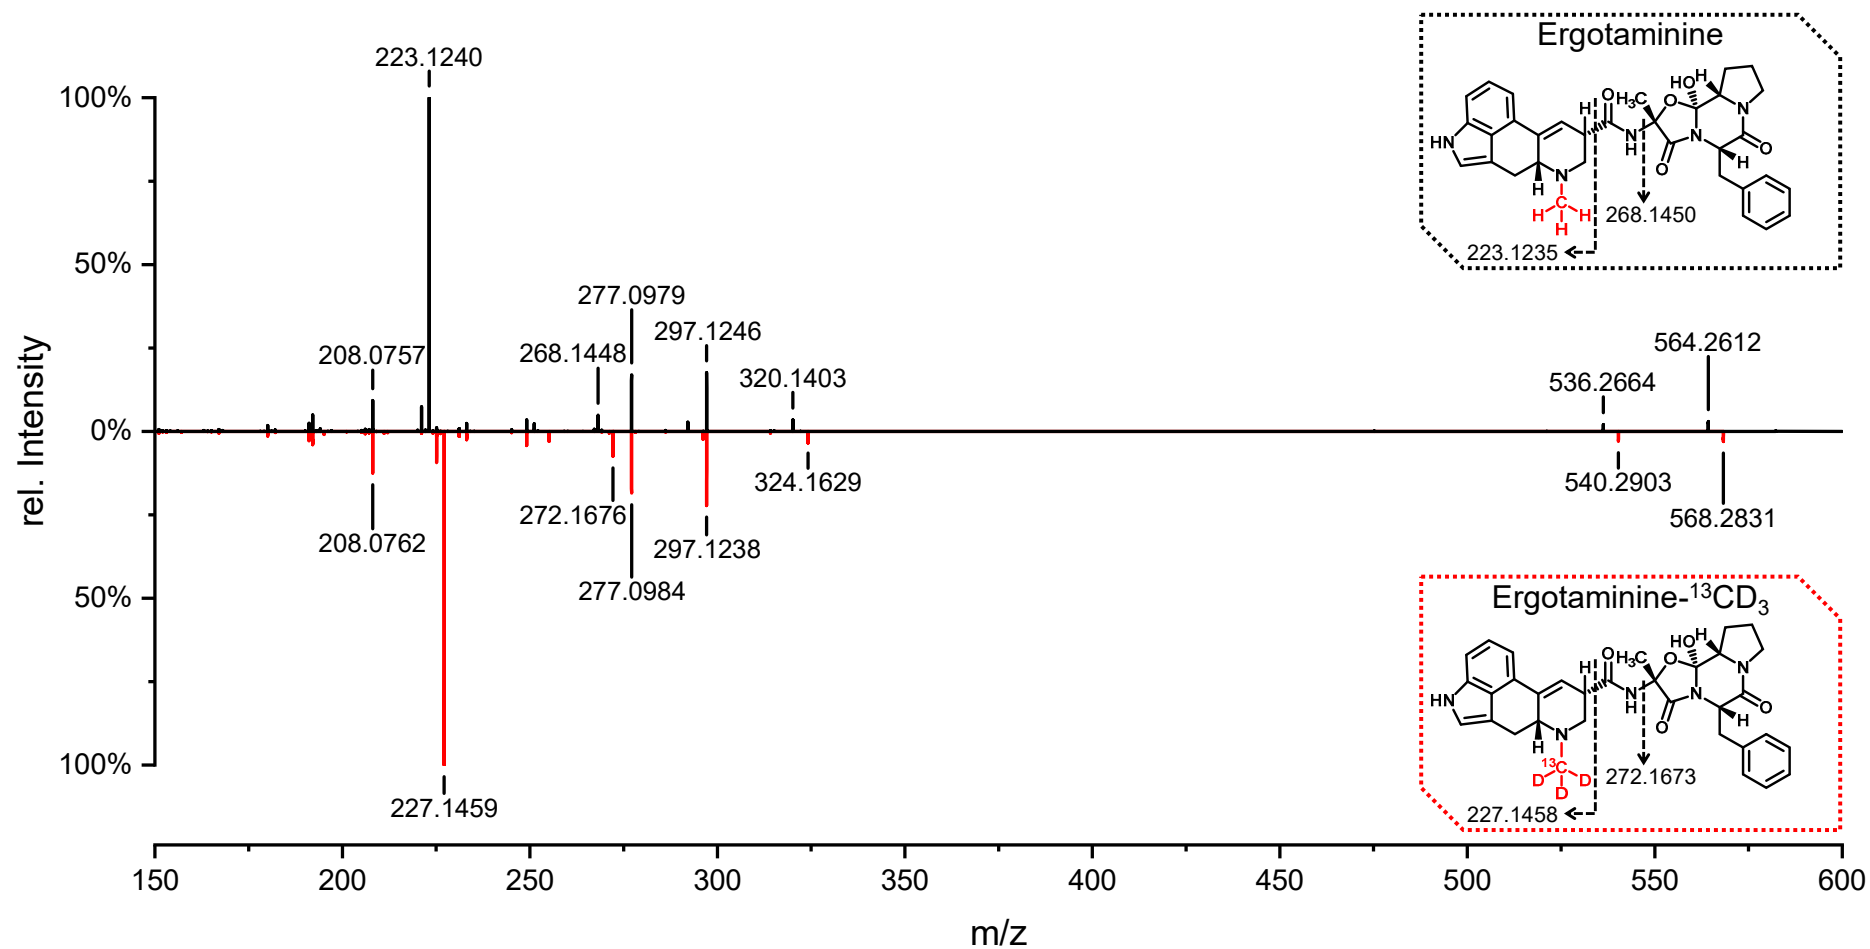

Figure S3. High resolution tandem mass spectra of unlabeled ergotamine (black) and isotopically labelled ergotamine-<sup>13</sup>CD<sub>3</sub> (red).

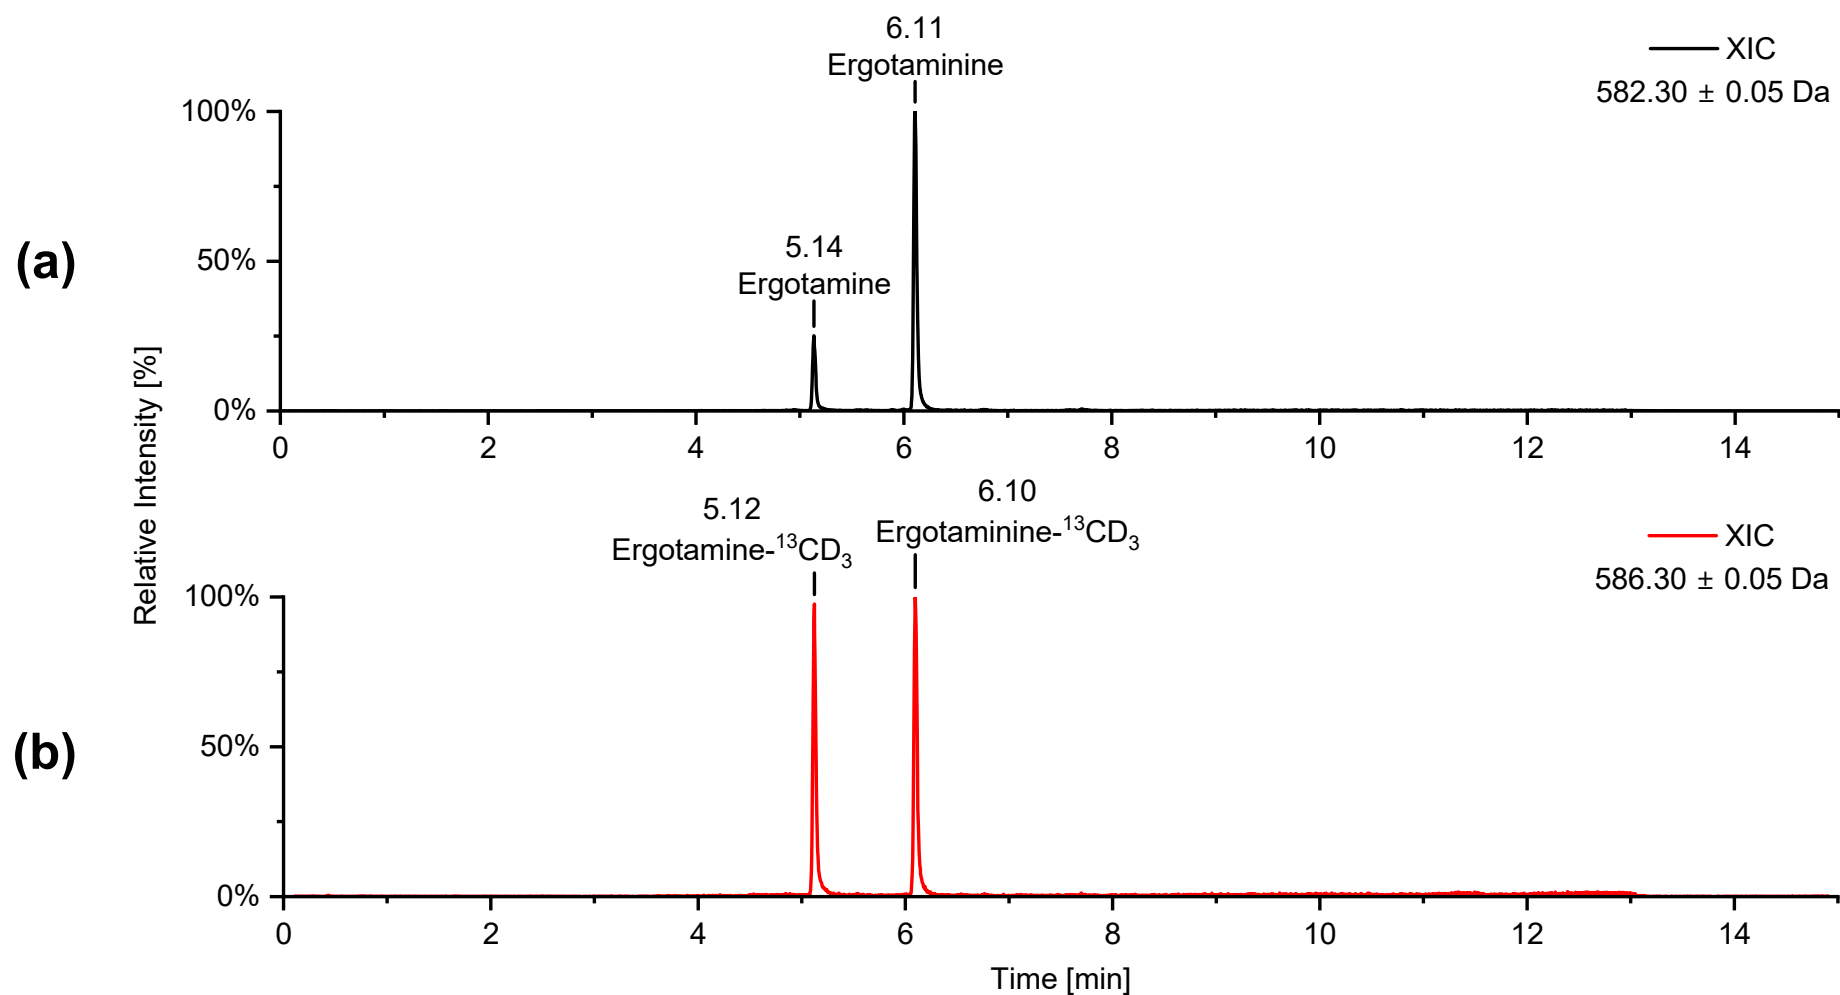

Figure S4. Extracted ion chromatogram (XIC) of **a)** unlabeled ergotamine and ergotamine **b)** isotopically labelled ergotamine-<sup>13</sup>CD<sub>3</sub> and ergotamine-<sup>13</sup>CD<sub>3</sub>.

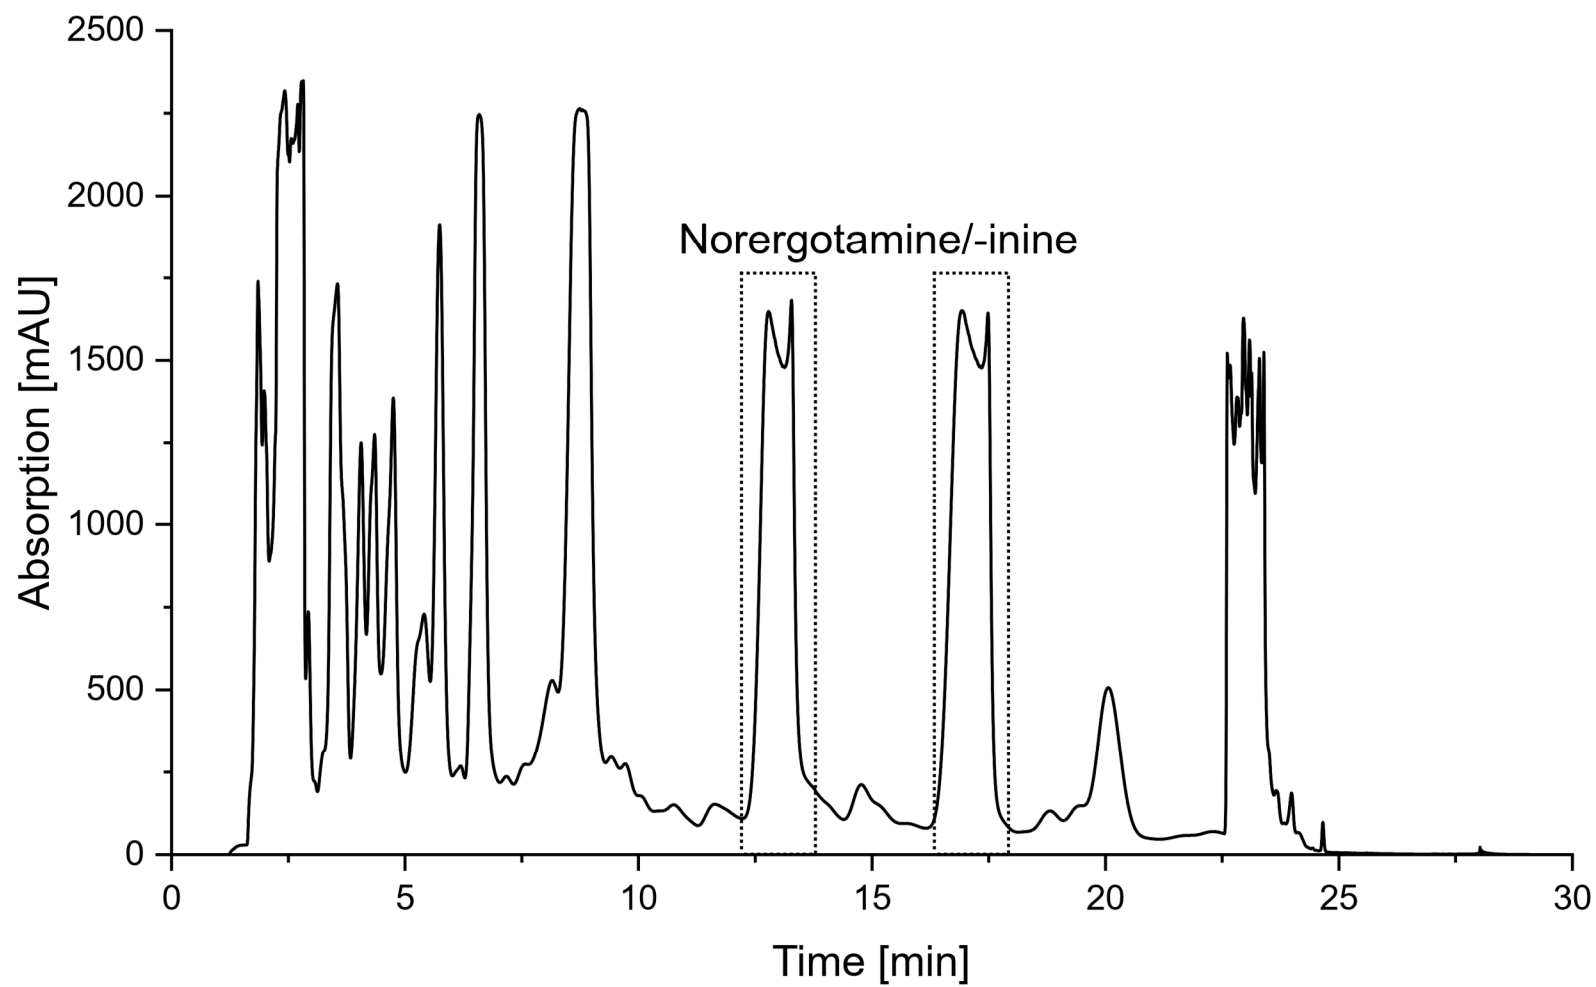

Figure S5. Preparative HPLC-DAD chromatogram for the purification of norergotamine and norergotaminine.

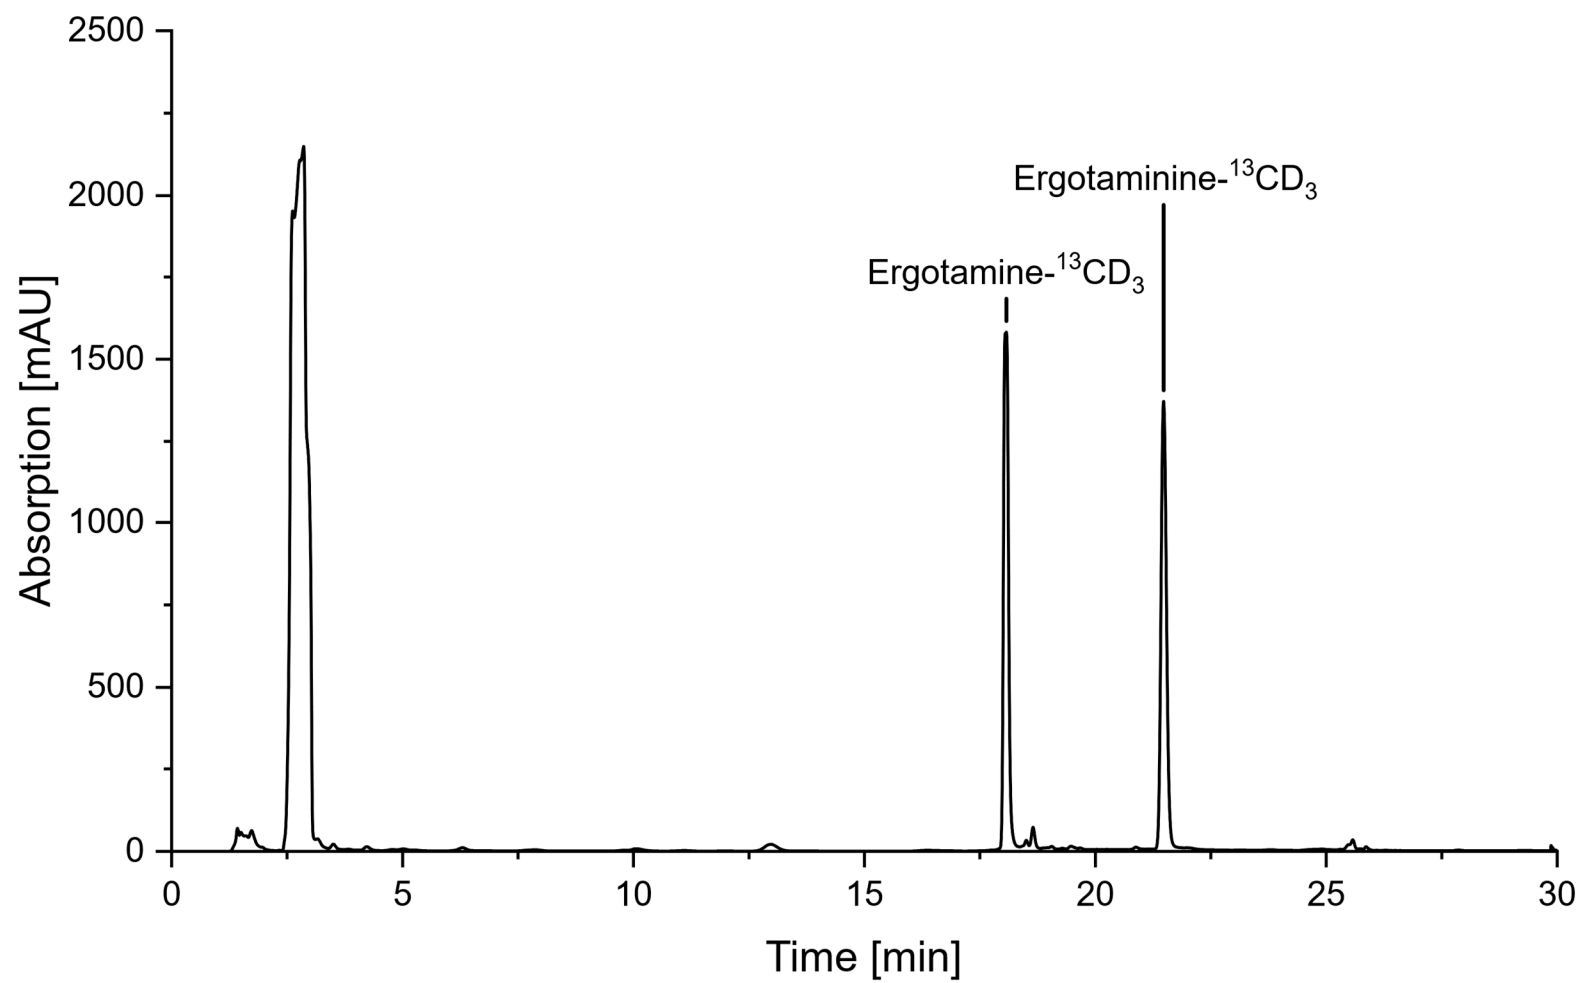

Figure S6. Preparative HPLC-DAD chromatogram for the purification of ergotamine-<sup>13</sup>CD<sub>3</sub> and ergotaminine-<sup>13</sup>CD<sub>3</sub>.
